# Supplementary material for: Elucidating the surface compositions of Pd@PtnL core–shell nanocrystals through catalytic reactions and spectroscopy probes
Source: Royal Society of Chemistry journal article supplement (doi:10.1039/d1nr05636k), 2021-01-01
Supplement: d1nr05636k1.pdf [file d1nr05636k1.pdf]

# Elucidating the Surface Compositions of Pd@Pt<sub>nL</sub> Core-Shell Nanocrystals through Catalytic Reactions and Spectroscopy Probes

Peng Zhai,<sup>a†</sup> Yifeng Shi,<sup>b†</sup> Qiuxiang Wang,<sup>c</sup> Younan Xia,<sup>\*b,c,d</sup> Kunlun Ding<sup>\*a</sup>

<sup>a</sup>Department of Chemical Engineering, Louisiana State University, Baton Rouge, Louisiana 70803, USA. E-mail: kunlunding@lsu.edu (for catalytic measurements and spectra characterization)

<sup>b</sup>School of Chemical and Biomolecular Engineering, Georgia Institute of Technology, Atlanta, Georgia 30332, USA. E-mail: younan.xia@bme.gatech.edu (for material synthesis and electron microscope characterization)

<sup>c</sup>The Wallace H. Coulter Department of Biomedical Engineering, Georgia Institute of Technology and Emory University, Atlanta, Georgia 30332, USA

<sup>d</sup>School of Chemistry and Biochemistry, Georgia Institute of Technology, Atlanta, Georgia 30332, USA

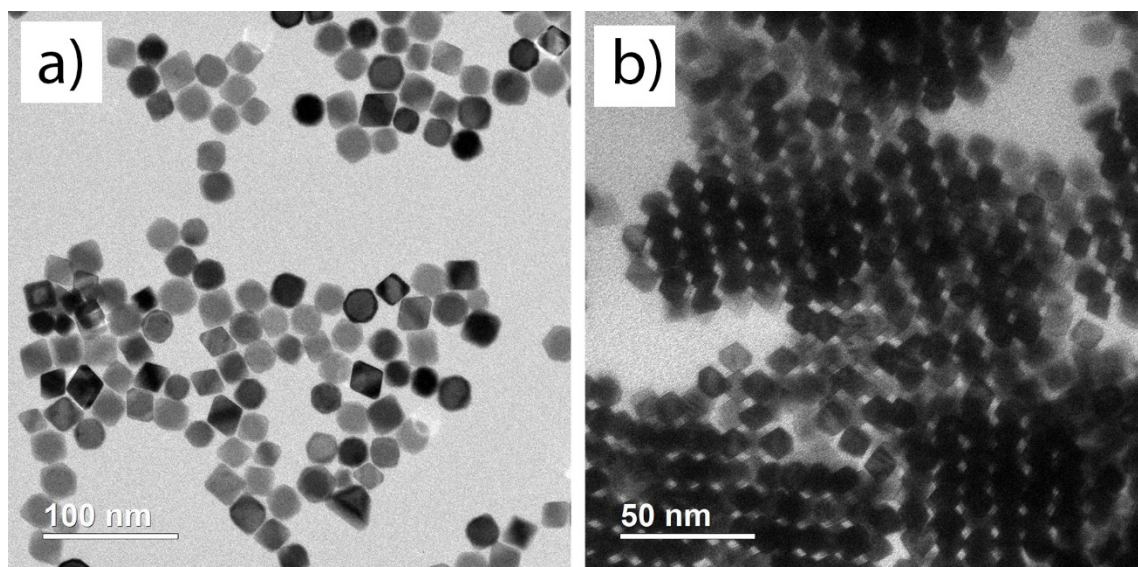

**Figure S1.** TEM images of (a) Pd octahedral and (b) Pt octahedral nanocrystals used as reference samples in this study.

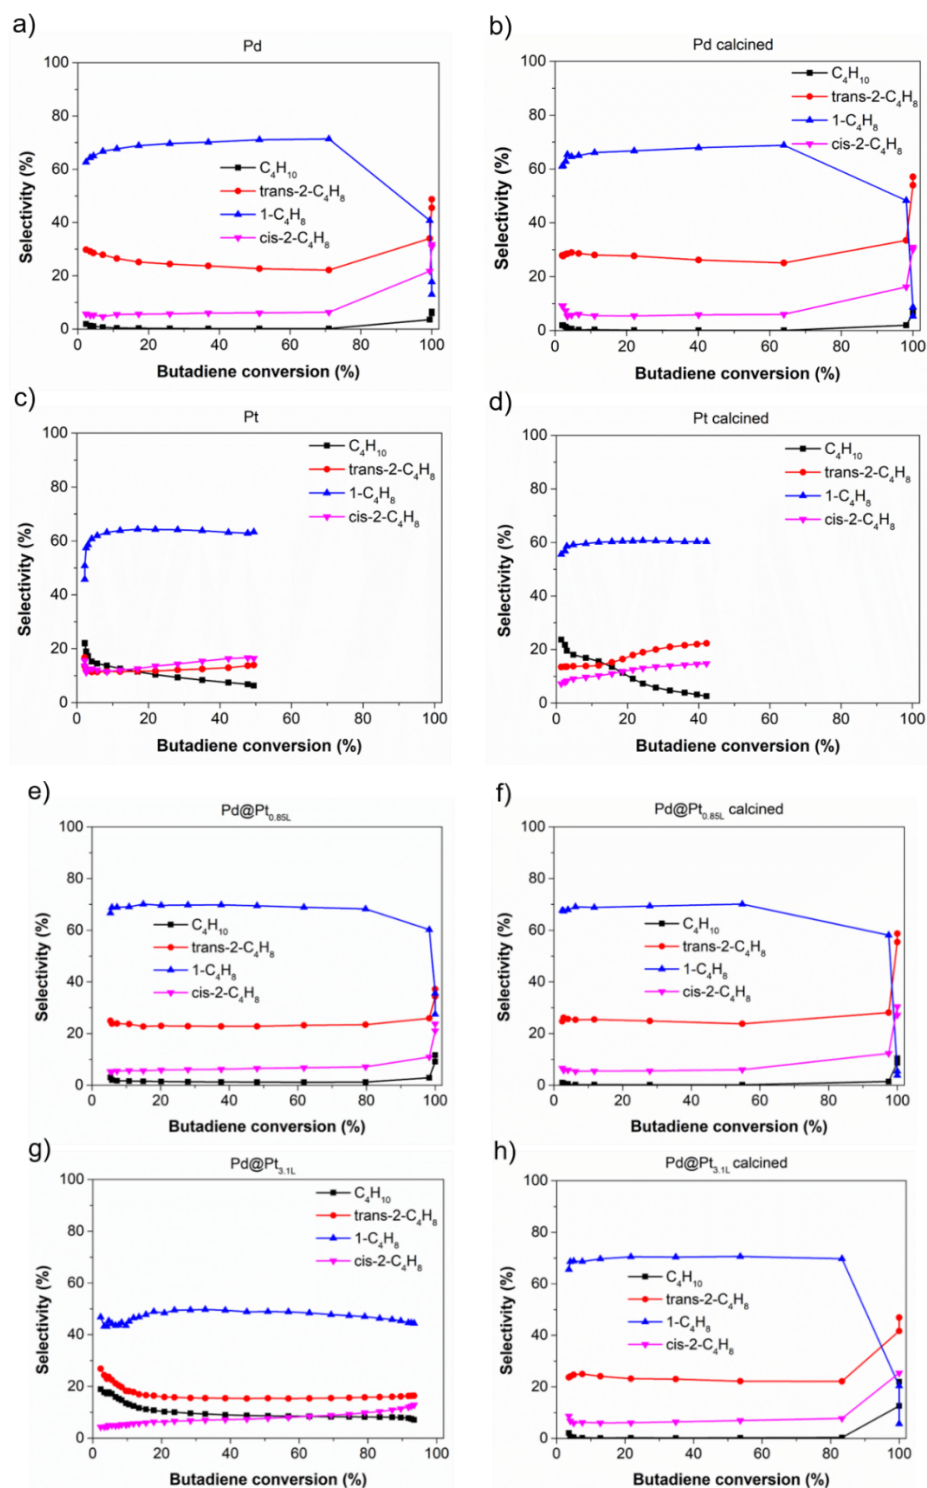

**Figure S2.** The selectivity of butadiene hydrogenation as a function of butadiene conversion on (a) non-calcined Pd, (b) calcined Pd, (c) non-calcined Pt, (d) calcined Pt, (e) non-calcined Pd@Pt<sub>0.85L</sub>, (f) calcined Pd@Pt<sub>0.85L</sub>, (g) non-calcined Pd@Pt<sub>3.1L</sub>, and (h) calcined Pd@Pt<sub>3.1L</sub>. All catalysts were reduced at 100 °C in 10% H<sub>2</sub>/N<sub>2</sub> prior to catalytic tests.

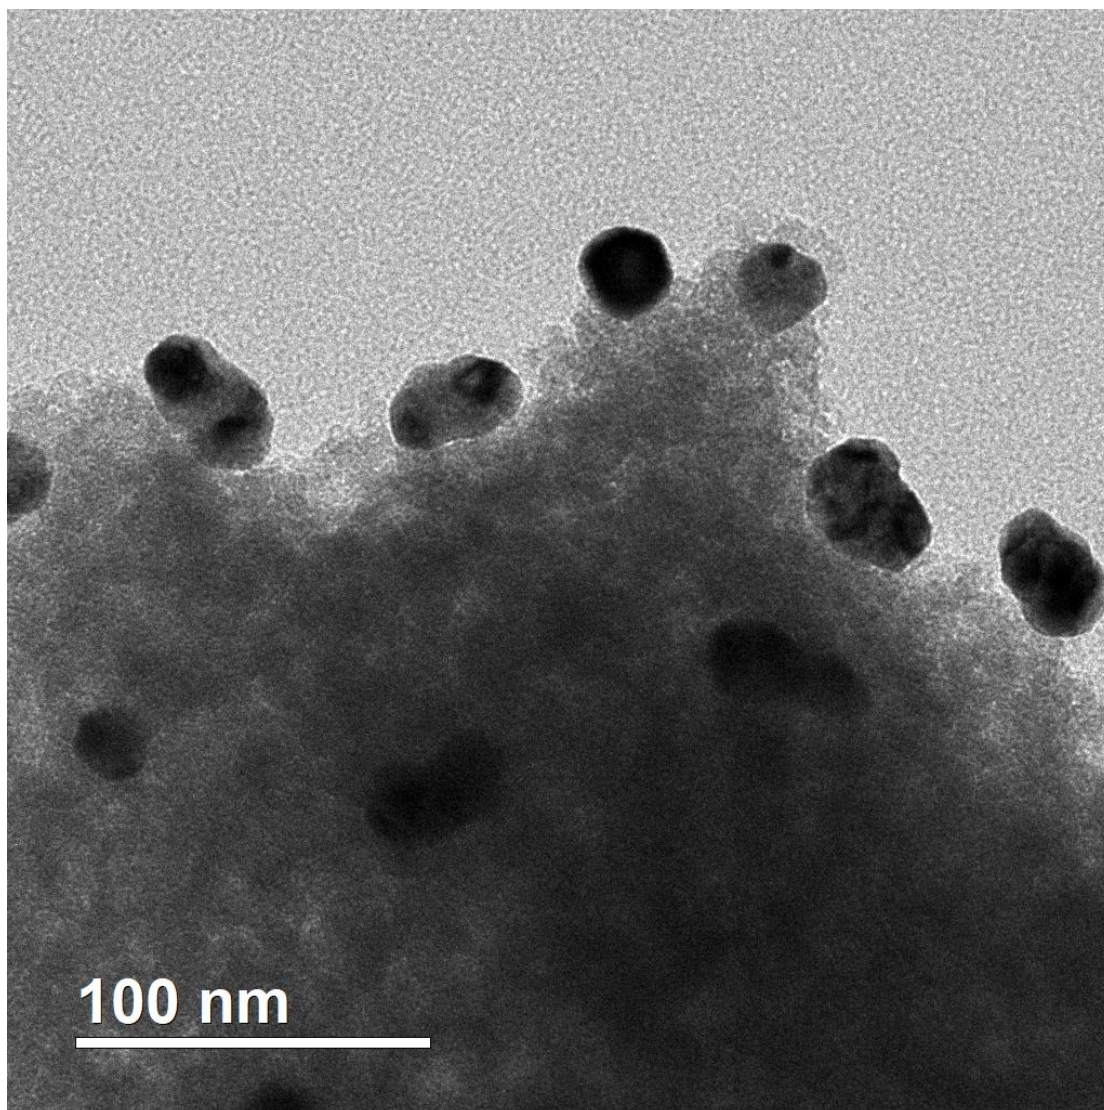

**Figure S3.** TEM image of the Pd octahedral nanocrystals (supported on SiO<sub>2</sub>) after calcination under 10% O<sub>2</sub>/N<sub>2</sub> at 400 °C for 30 min.

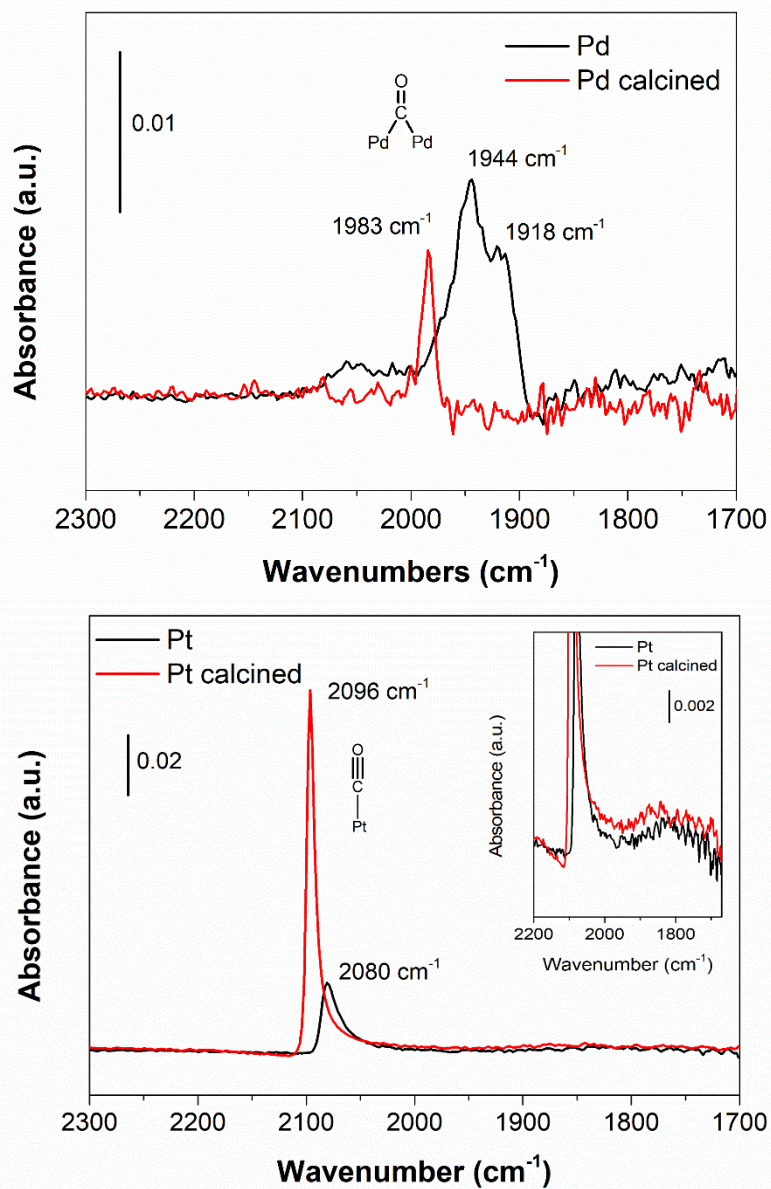

**Figure S4.** IR spectra of the CO adsorbed on Pd and Pt samples at room temperature. These catalysts were reduced at 100 °C in 10%  $\text{H}_2/\text{N}_2$  prior to CO adsorption.

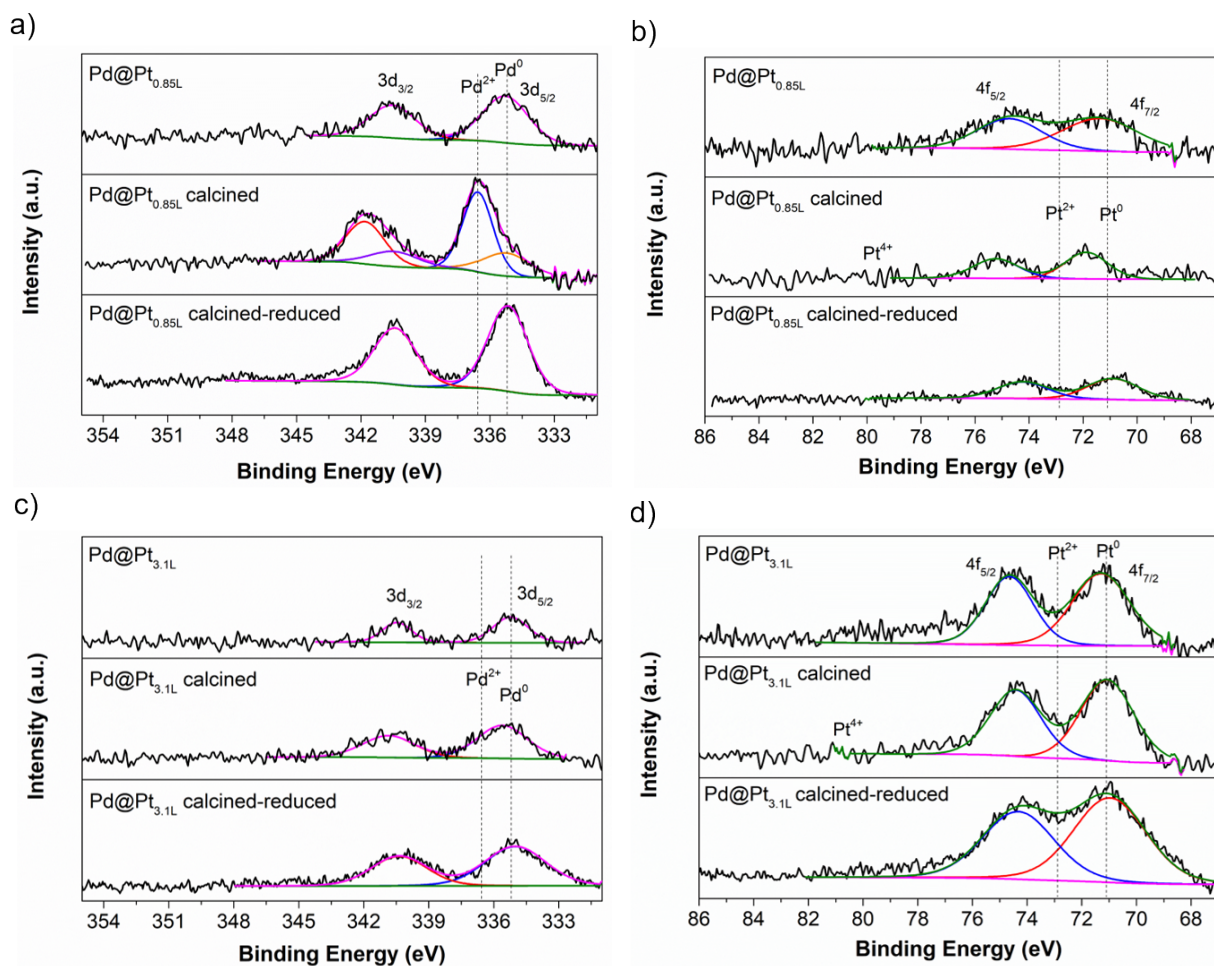

**Figure S5.** XPS spectra of two different Pd@Pt bimetallic catalysts after undergoing different treatments. (a) Pd 3d and (b) Pt 4f spectra of Pd@Pt<sub>0.85L</sub>; (c) Pd 3d and (d) Pt 4f spectra of Pd@Pt<sub>3.1L</sub>.

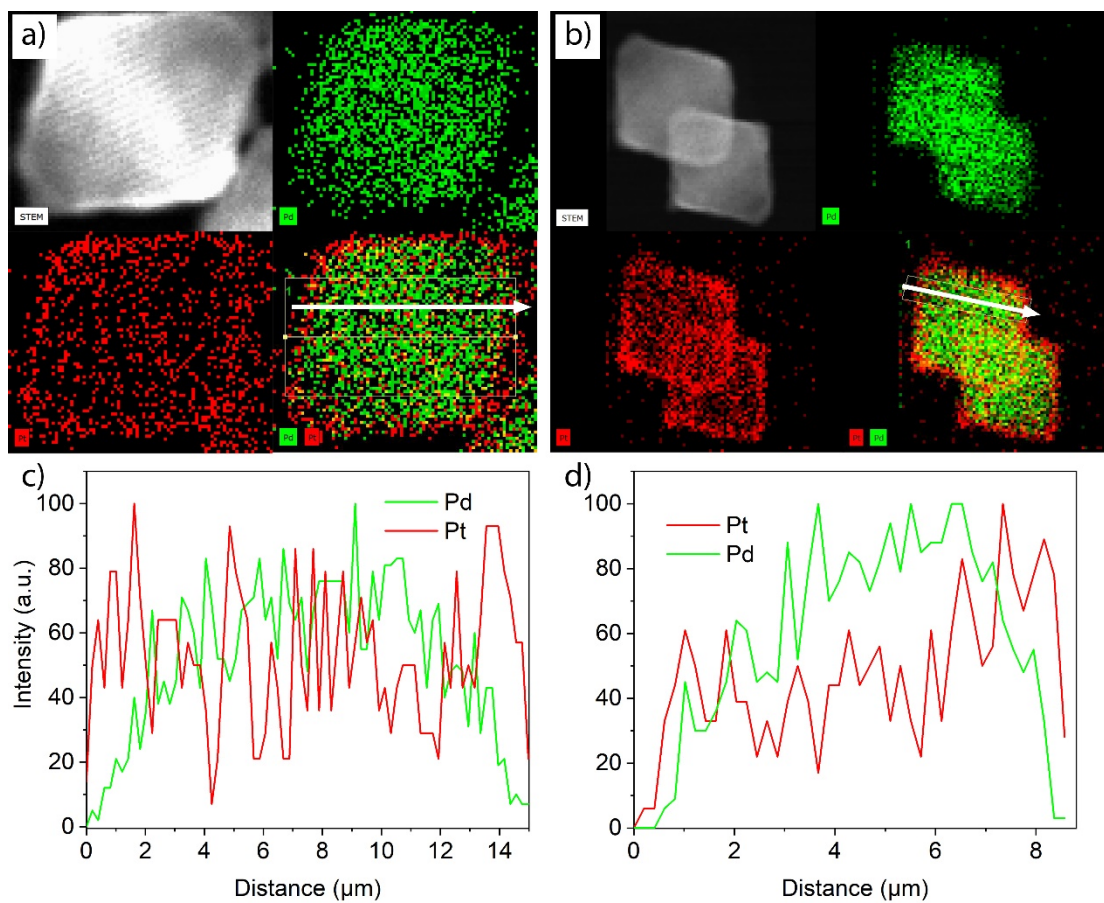

**Figure S6.** EDX mapping of (a) Pd@Pt<sub>3.1L</sub> before calcination and (b) after calcination. The corresponding line scan profiles are given in (c) and (d), respectively.
